# Supplementary material
Source: PubMed Central journal article supplement (PMC2993546)
Supplement: supp_110.170555_JPET170555_Supplemental_figs.pdf [file supp_110.170555_JPET170555_Supplemental_figs.pdf]

***In vitro* cytotoxicity and *in vivo* efficacy, pharmacokinetics and metabolism of 10074-G5, a novel small-molecule inhibitor of c-Myc/Max dimerization**

Journal of Pharmacology and Experimental Therapeutics

**FIG. 1.**

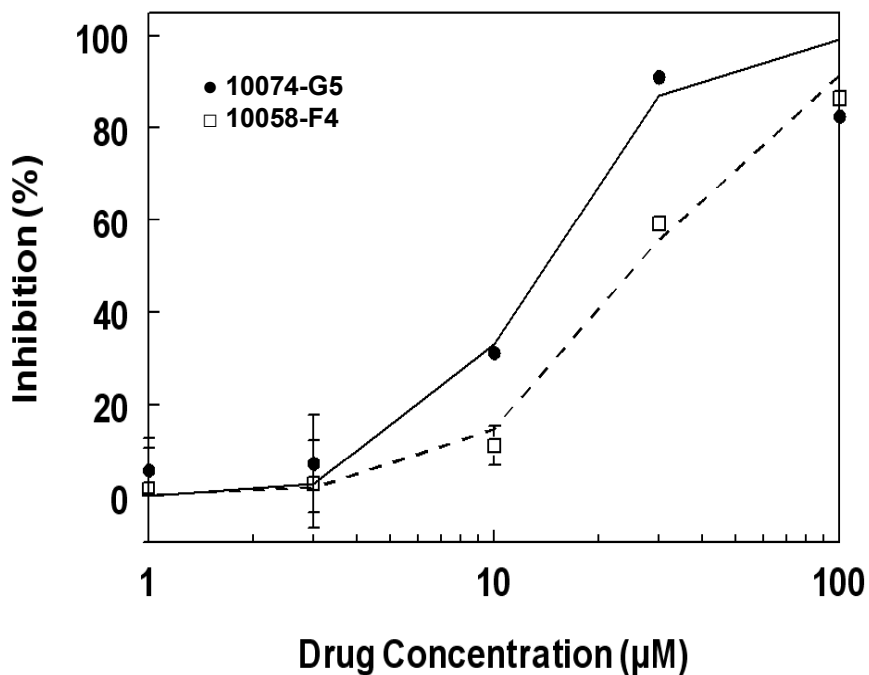

FIG. 1. *In vitro* growth inhibition of 10074-G5 and 10058-F4 against HL-60, a myelocytic leukemia cell line, determined using MTT assay at 72 h. The data points are mean  $\pm$  SD of 3 wells/concentration, and curves are the best fit to the data using the Hill equation.
